# Supplementary material
Source: PubMed Central journal article supplement (PMC4374781)

Supplementary Figure 1. Effect of hypoxia on chemokine and cytokine release. (A-D) Neutrophils were incubated under hypoxia or normoxia for 30 min, prior to the addition of LBP/LPS for a further 3.5 h. The supernatants were analyzed using commercial antibody arrays (RayBio® Human Chemokine Antibody Array 1 and RayBio® Human Inflammation Antibody Array 1). Signal intensity was quantified using Scion Image and positive controls were used to normalize data in accordance with manufacturer's instructions. Results represent mean {plus minus} SD for 3 independent experiments.

Supplementary Figure 2. Effect of hypoxia on NADPH oxidase component mRNA. Hypoxia does not affect the abundance of transcripts for NADPH oxidase components. mRNA for p47phox, p67phox, gp91phox, p22phox, rac2 and p40phox was quantified by qPCR in neutrophils incubated under either normoxia or hypoxia for 1-6 h. Relative gene expression (fold change) is expressed as  $2^{-\Delta\Delta CT}$  (see Methods for details) and represent mean {plus minus} SEM of (n) = 2 independent experiments each performed in triplicate.

Supplementary Figure 1 McGovern et al.

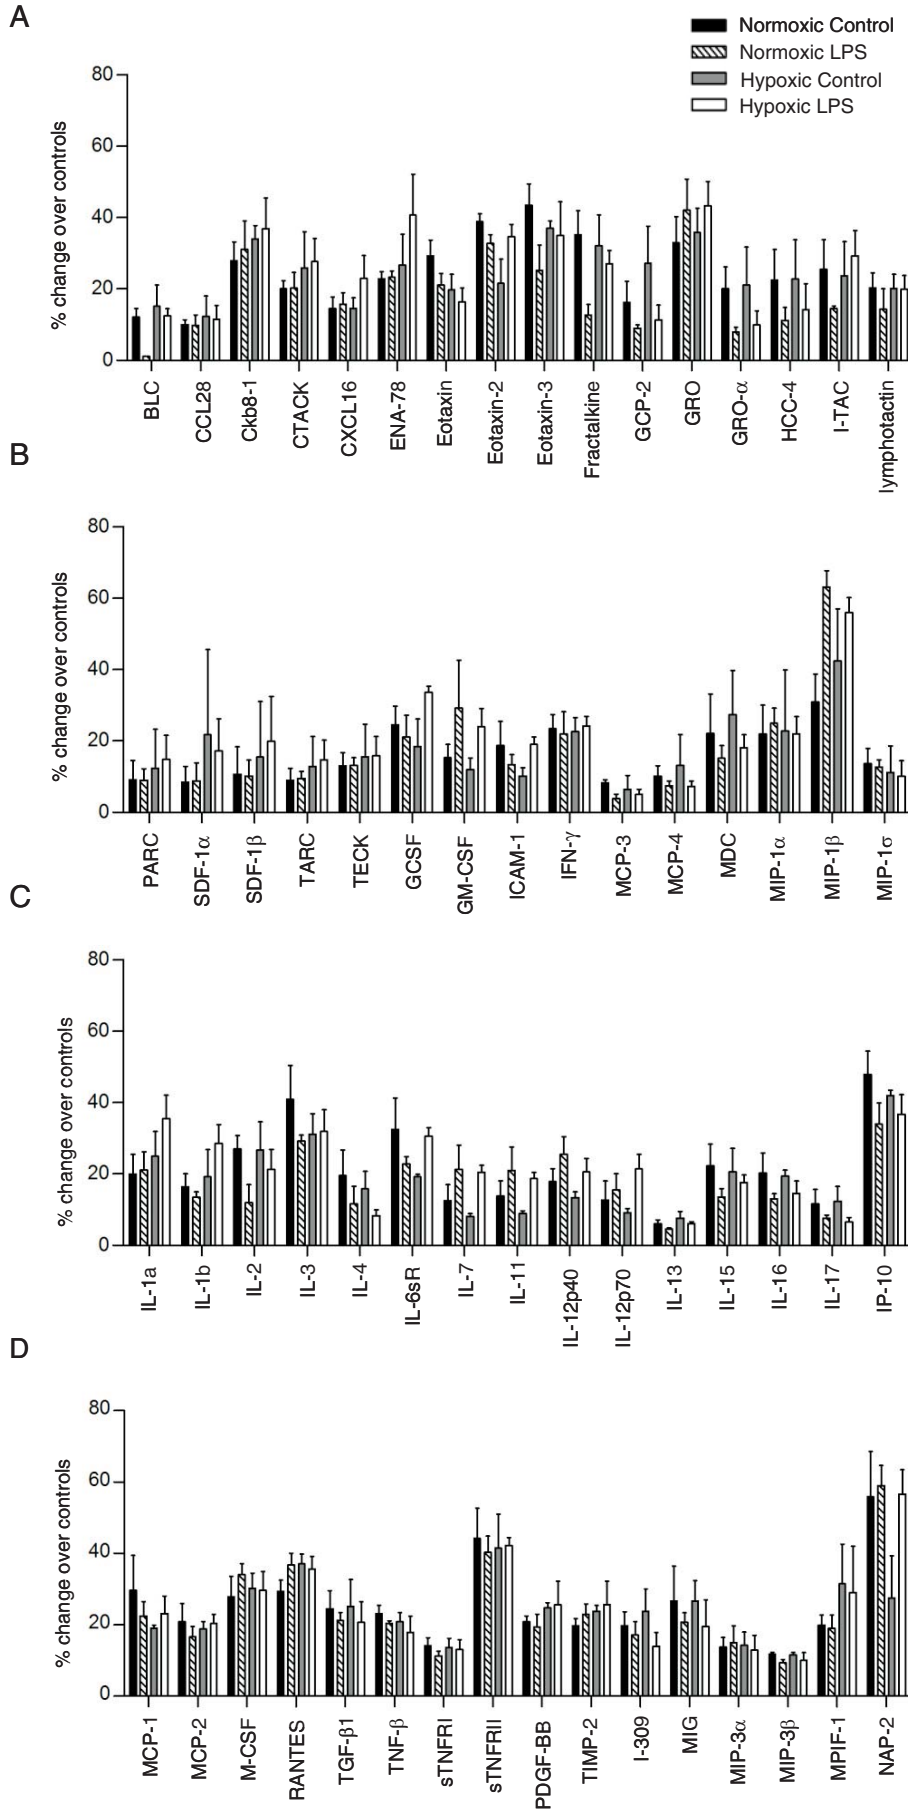

Supplementary Figure 2 McGovern et al.

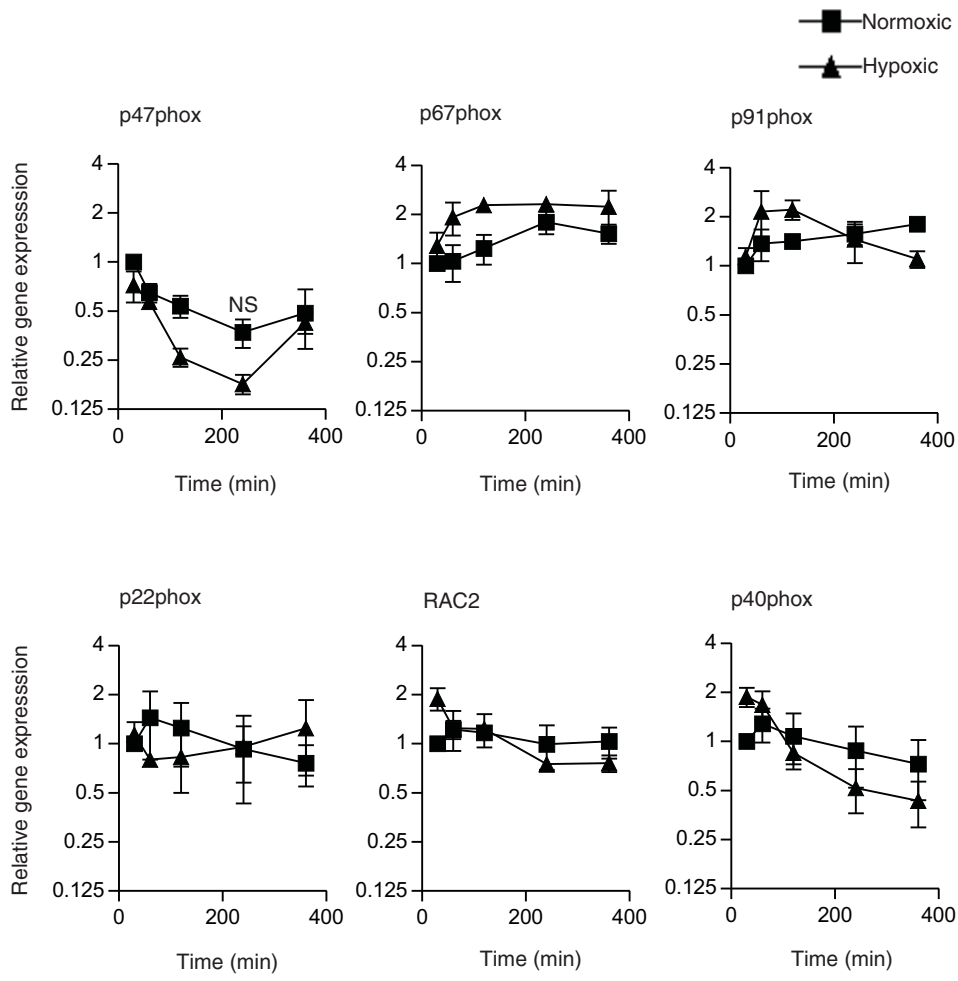

Supplement: NIHMS58013-supplement-Supp.pdf [file NIHMS58013-supplement-Supp.pdf]
